# Supplementary material for: Synthesis and CO2 photoreduction of two 3d–4f heterometal–organic frameworks
Source: Royal Society of Chemistry journal article supplement (doi:10.1039/d1nj03479k), 2021-01-01
Supplement: d1nj03479k1.pdf [file d1nj03479k1.pdf]

## Supplementary Information

### Synthesis and CO<sub>2</sub> photoreduction of two 3d–4f heterometal–organic frameworks

Yu Yang,<sup>a</sup> Yaomei Fu,<sup>b</sup> Siqi You,<sup>a</sup> Mingyue Li,<sup>a</sup> Chao Qin,<sup>\*a</sup> Liang Zhao<sup>\*a</sup> and Zhongmin Su<sup>a</sup>

<sup>a</sup>Key Laboratory of Polyoxometalate and Reticular Material Chemistry of Ministry of Education, Northeast Normal University, Changchun, Jilin, 130024 (China).

Email: [ginc703@nenu.edu.cn](mailto:ginc703@nenu.edu.cn); [zhaol352@nenu.edu.cn](mailto:zhaol352@nenu.edu.cn)

<sup>b</sup>Shandong Peninsula Engineering Research Center of Comprehensive Brine Utilization, Weifang University of Science and Technology, Shouguang, 262700 (China)

## Experimental Procedures

### Materials

All the reagents were purchased from chemical suppliers without any further purification.

### Characterization

The elemental analyses of C, H, and N were performed on a Perkin-Elmer 2400 CHN elemental analyzer. X-ray diffraction patterns (PXRD) were recorded on a Siemens D5005 diffractometer with graphite-monochromatized Cu K $\alpha$  ( $\lambda = 1.5418 \text{ \AA}$ ) radiation. The Fourier transform infrared (FT-IR) spectra were recorded in the range of 4000–400  $\text{cm}^{-1}$  using a Matton Alpha-Centauri FT-IR spectrophotometer with KBr pellets. Thermogravimetric analyses (TGA) were performed using a Perkin-Elmer TG-7 analyzer heated from 25 °C to 800 °C under N<sub>2</sub> at a heating rate of 10 °C min<sup>-1</sup>. The UV–vis absorption spectra were recorded on a Shimadzu UV-2550 spectrophotometer in the range of 200–1600 nm. Steady-state photoluminescence (PL) spectra and time-resolved PL decay spectra were performed on a Spectrometer (Hitachi F-4600). The photoluminescent quenching of [Ru(bpy)<sub>3</sub>]Cl<sub>2</sub> (7 mg) were performed in the 4mL MeCN of increasing amounts of catalyst (0, 0.25, 0.5, 0.75, and 1.0 mg) respectively.

### Single-Crystal X-ray Crystallography

Single-crystal diffraction data were recorded on a Bruker Apex CCD II diffractometer at 296 K, with graphite-monochromated Mo-K $\alpha$  radiation ( $\lambda = 0.71073 \text{ \AA}$ ). The data frames were recorded and processed using the APEX 2 suite of programs. The data were corrected for absorption and beam corrections based on the multi-scan technique as implemented in SADABS. The structures were solved by the direct method using SHELXS or SHELXT and refined by fullmatrix least-squares on  $F^2$  using the SHELXL software.

### Electrochemical Measurements

The Mott-Schottky plots were measured on an electrochemical system (CHI760e) via a conventional three-electrode system in a 0.1 M acetonitrile solution of tetrabutylammonium hexafluorophosphate.

The 6mg catalyst was dispersed in 1 mL acetonitrile solution to produce homogeneous slurry.

Subsequently, 60  $\mu\text{L}$  of the slurry was transferred to a fluoride-tin oxide (FTO) glass plate covered with about 1  $\text{cm}^2$  of platinum plate as a counter at frequencies of 500, 800 and 1000 Hz, Ag / AgCl were used as reference electrodes.

### Results and Discussion

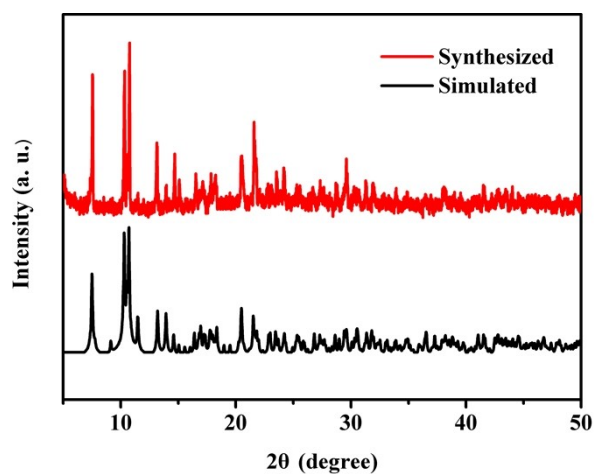

**Fig. S1** PXRD patterns of **1** with simulated (black line), as-synthesized (red line).

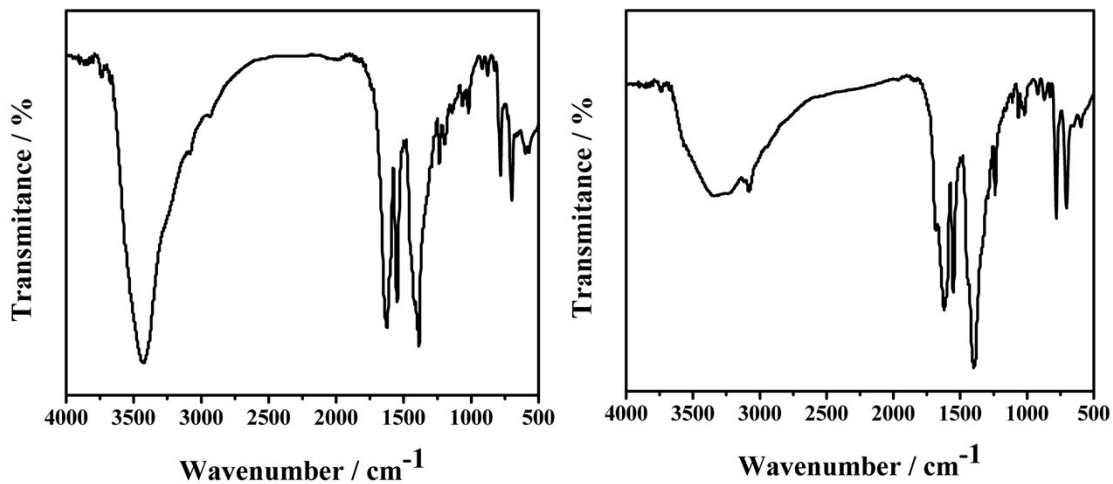

Fig. S2 IR spectra of **1** (left) and **2**(right).

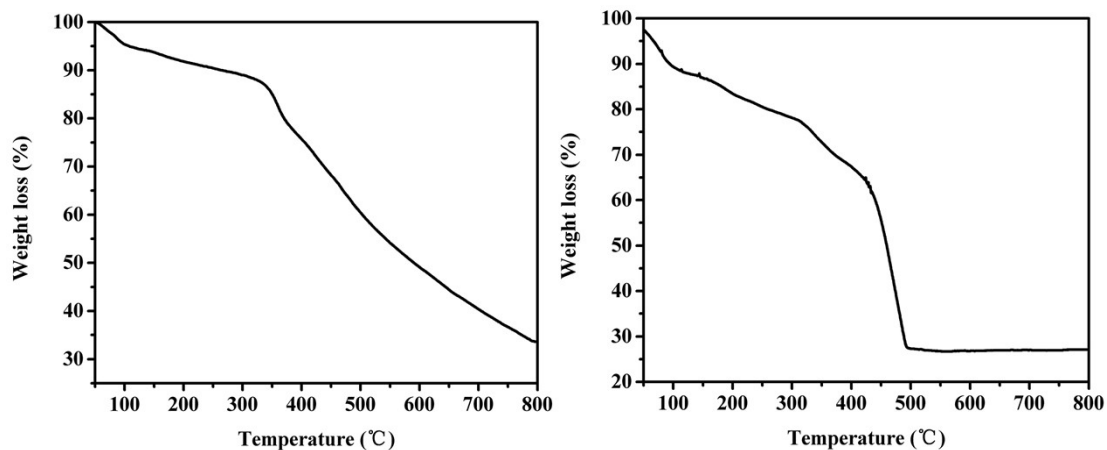

Fig. S3 TG curves of **1** (left) and **2** (right).

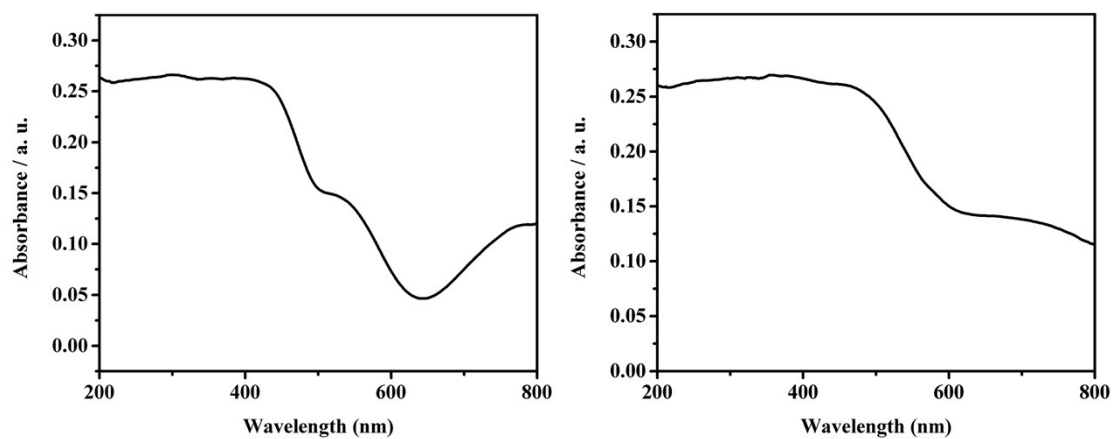

Fig. S4 UV-Vis spectra of **1** (left) and **2**(right).

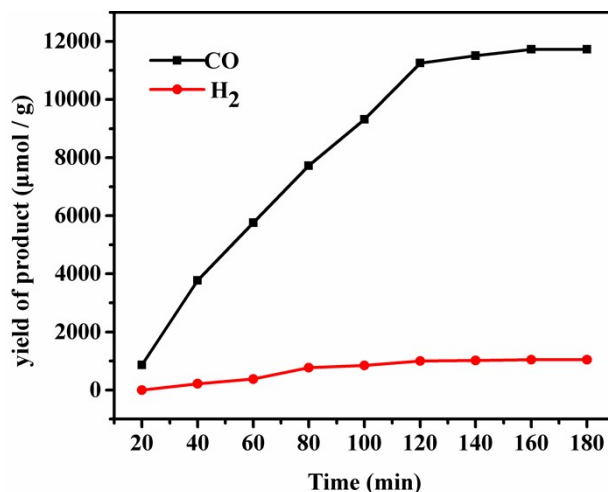

**Fig. S5** Product of CO and H<sub>2</sub> evolution catalyzed by **2** in the presence of CO<sub>2</sub>-saturated CH<sub>3</sub>CN/TEOA/H<sub>2</sub>O (4:1:1, V:V:V) solvent mixture under irradiation using a 300 W Xe lamp at 293K.

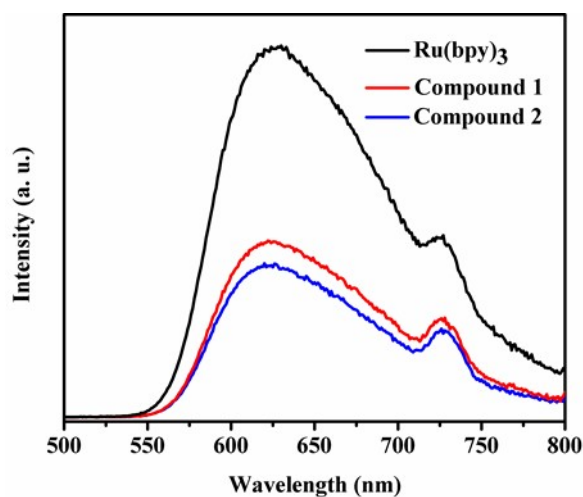

**Fig. S6** Effect of adding 1mg **1** and **2** on the steady-state fluorescence spectra of [Ru(bpy)<sub>3</sub>]Cl<sub>2</sub>.

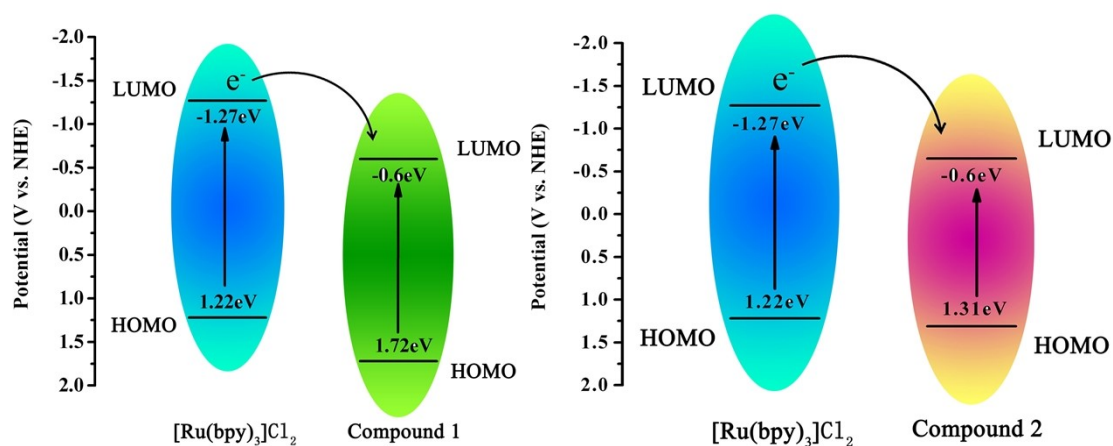

**Fig. S7** The schematic energy-level diagrams showing electron transfer from [Ru(bpy)<sub>3</sub>]<sup>2+</sup> to **1** (left) and **2** (right).

**Table S1. Crystal data and structure refinements for 1 and 2**

| Compound                                               | 1                                                                                | 2                                                                                |
|--------------------------------------------------------|----------------------------------------------------------------------------------|----------------------------------------------------------------------------------|
| Empirical formula                                      | C <sub>40</sub> H <sub>33</sub> Gd <sub>2</sub> N <sub>9</sub> NiO <sub>23</sub> | C <sub>44</sub> H <sub>48</sub> CoGd <sub>2</sub> N <sub>9</sub> O <sub>23</sub> |
| Formula weight                                         | 1380.96                                                                          | 1444.34                                                                          |
| Temperature/K                                          | 173.02                                                                           | 173.02                                                                           |
| Crystal system                                         | monoclinic                                                                       | triclinic                                                                        |
| Space group                                            | C2/c                                                                             | P-1                                                                              |
| <i>a</i> /Å                                            | 17.5924(13)                                                                      | 11.0599(10)                                                                      |
| <i>b</i> /Å                                            | 16.7807(12)                                                                      | 12.4532(10)                                                                      |
| <i>c</i> /Å                                            | 20.6012(15)                                                                      | 22.2391(18)                                                                      |
| $\alpha$ /°                                            | 90                                                                               | 101.704(3)                                                                       |
| $\beta$ /°                                             | 110.266(2)                                                                       | 103.402(3)                                                                       |
| $\gamma$ /°                                            | 90                                                                               | 95.429(3)                                                                        |
| Volume/Å <sup>3</sup>                                  | 5705.2(7)                                                                        | 2885.2(4)                                                                        |
| Z                                                      | 4                                                                                | 2                                                                                |
| $\rho_{\text{calc}}$ g/cm <sup>3</sup>                 | 1.608                                                                            | 1.663                                                                            |
| $\mu$ /mm <sup>-1</sup>                                | 2.704                                                                            | 2.639                                                                            |
| <i>F</i> (000)                                         | 2704.0                                                                           | 1428.0                                                                           |
| Reflections collected                                  | 40832                                                                            | 66850                                                                            |
| Independent reflections                                | 5072 [R <sub>int</sub> = 0.0970, R <sub>sigma</sub> = 0.0517]                    | 10259 [R <sub>int</sub> = 0.0557, R <sub>sigma</sub> = 0.0326]                   |
| Goodness-of-fit on F <sup>2</sup>                      | 1.045                                                                            | 1.035                                                                            |
| Final R indexes [ <i>I</i> >= 2 $\sigma$ ( <i>I</i> )] | R <sub>1</sub> = 0.0384, wR <sub>2</sub> = 0.1021                                | R <sub>1</sub> = 0.0294, wR <sub>2</sub> = 0.0821                                |
| Final R indexes [all data]                             | R <sub>1</sub> = 0.0486, wR <sub>2</sub> = 0.1100                                | R <sub>1</sub> = 0.0380, wR <sub>2</sub> = 0.0863                                |

$${}^a R_1 = \sum ||F_0| - |F_c|| / \sum |F_0| \cdot {}^b wR_2 = [\sum w(F_0^2 - F_c^2)^2 / \sum w(F_0^2)^2]^{1/2}$$

**Table S2. The comparison of CO evolution rate of reported MOFs for converting CO<sub>2</sub> to CO under visible light irradiation**

| Catalyst                            | Light source (nm)   | Photosensitizer                | CO production rate                                          | Reference                                       |
|-------------------------------------|---------------------|--------------------------------|-------------------------------------------------------------|-------------------------------------------------|
| PCN-250-Fe <sub>2</sub> Mn          | 420< $\lambda$ <800 | [Ru(bpy)]Cl <sub>2</sub>       | 21.51 mmol g <sup>-1</sup> h <sup>-1</sup>                  | Appl. Catal. B: Environ. 2020, 276, 119173.     |
| PCN-250-Fe <sub>3</sub>             | 420< $\lambda$ <800 | [Ru(bpy)]Cl <sub>2</sub>       | 13.45 mmol g <sup>-1</sup> h <sup>-1</sup>                  |                                                 |
| BIF-101                             | $\lambda \geq 420$  | [Ru(bpy)]Cl <sub>2</sub>       | 5830 $\mu\text{mol g}^{-1} \text{h}^{-1}$                   | J. Mater. Chem. A, 2019, 7, 17272-17276         |
| <b>Compound 2</b>                   | $\lambda \geq 420$  | <b>[Ru(bpy)]Cl<sub>2</sub></b> | <b>5625 <math>\mu\text{mol g}^{-1} \text{h}^{-1}</math></b> | <b>This work</b>                                |
| (Co/Ru) <sub>n</sub> -UiO-67(bpydc) | $\lambda > 450$     | [Ru(bpy)]Cl <sub>2</sub>       | 4520 $\mu\text{mol g}^{-1} \text{h}^{-1}$                   | Appl. Catal. B: Environ. 2019, 245, 496-501.    |
| 2D-Co <sub>2</sub> TCPE-PE          | $\lambda \geq 420$  | [Ru(bpy)]Cl <sub>2</sub>       | 4147 $\mu\text{mol g}^{-1} \text{h}^{-1}$                   | Angew. Chem., Int. Ed., 2020, 59, 23588 – 23592 |
| <b>Compound 1</b>                   | $\lambda \geq 420$  | <b>[Ru(bpy)]Cl<sub>2</sub></b> | <b>3811 <math>\mu\text{mol g}^{-1} \text{h}^{-1}</math></b> | <b>This work</b>                                |
| BIF-29                              | $\lambda \geq 420$  | [Ru(bpy)]Cl <sub>2</sub>       | 3334 $\mu\text{mol g}^{-1} \text{h}^{-1}$                   | Angew. Chem., Int. Ed., 2019, 58, 11752-11756   |
| 2D-Ni <sub>2</sub> TCPE-PE          | $\lambda \geq 420$  | [Ru(bpy)]Cl <sub>2</sub>       | 3000 $\mu\text{mol g}^{-1} \text{h}^{-1}$                   | Angew. Chem., Int. Ed., 2020, 59, 23588 – 23592 |
| 2D-Ni <sub>2</sub> TCPE-ME          | $\lambda \geq 420$  | [Ru(bpy)]Cl <sub>2</sub>       | 2944 $\mu\text{mol g}^{-1} \text{h}^{-1}$                   |                                                 |
| 2D-Co <sub>2</sub> TCPE             | $\lambda \geq 420$  | [Ru(bpy)]Cl <sub>2</sub>       | 2560 $\mu\text{mol g}^{-1} \text{h}^{-1}$                   |                                                 |
| 2D-Ni <sub>2</sub> TCPE             | $\lambda \geq 420$  | [Ru(bpy)]Cl <sub>2</sub>       | 2000 $\mu\text{mol g}^{-1} \text{h}^{-1}$                   |                                                 |
| MOF-Co                              | $\lambda \geq 420$  | [Ru(bpy)]Cl <sub>2</sub>       | 1140 $\mu\text{mol g}^{-1} \text{h}^{-1}$                   | ACS Catal. 2019, 9, 1726-1732.                  |
| MOF-Ni                              | $\lambda \geq 420$  | [Ru(bpy)]Cl <sub>2</sub>       | 371.6 $\mu\text{mol g}^{-1} \text{h}^{-1}$                  |                                                 |
| MOF-525-Co                          | $\lambda \geq 420$  | —                              | 201.6 $\mu\text{mol g}^{-1} \text{h}^{-1}$                  | Angew. Chem., Int. Ed., 2016, 55, 14310-14314.  |
| Co-ZIF-9                            | $\lambda > 420$     | [Ru(bpy)]Cl <sub>2</sub>       | 83.6 $\mu\text{mol h}^{-1}$                                 | Angew. Chem., Int. Ed., 2014, 53, 1034-1038.    |

**Table S3. The comparison of the photocatalytic selectivity of reported MOFs for converting CO<sub>2</sub> to CO under visible light irradiation**

| Catalyst                   | Light source (nm)     | Photosensitizer                | Selectivity (%) | Reference                                       |
|----------------------------|-----------------------|--------------------------------|-----------------|-------------------------------------------------|
| MAF-X27/-OH                | $\lambda \geq 420$    | [Ru(bpy)]Cl <sub>2</sub>       | 98.2            | J. Am. Chem. Soc. 2018, 140, 38-41.             |
| MOF-Ni                     | $\lambda \geq 420$    | [Ru(bpy)]Cl <sub>2</sub>       | 97.7            | ACS Catal. 2019, 9, 1726-1732.                  |
| 2D-Ni <sub>2</sub> TCPE-PE | $\lambda \geq 420$    | [Ru(bpy)]Cl <sub>2</sub>       | 97.31           | Angew. Chem., Int. Ed., 2020, 59, 23588 – 23592 |
| 2D-Ni <sub>2</sub> TCPE    | $\lambda \geq 420$    | [Ru(bpy)]Cl <sub>2</sub>       | 97.21           |                                                 |
| 2D-Ni <sub>2</sub> TCPE-ME | $\lambda \geq 420$    | [Ru(bpy)]Cl <sub>2</sub>       | 96.93           |                                                 |
| <b>Compound 1</b>          | $\lambda \geq 420$    | <b>[Ru(bpy)]Cl<sub>2</sub></b> | <b>94.85</b>    | <b>This work</b>                                |
| <b>Compound 2</b>          | $\lambda \geq 420$    | <b>[Ru(bpy)]Cl<sub>2</sub></b> | <b>94.46</b>    | <b>This work</b>                                |
| BIF-101                    | $\lambda \geq 420$    | [Ru(bpy)]Cl <sub>2</sub>       | 84.1            | J. Mater. Chem. A, 2019, 7, 17272-17276         |
| BIF-29                     | $\lambda \geq 420$    | [Ru(bpy)]Cl <sub>2</sub>       | 82.6            | Angew. Chem., Int. Ed., 2019, 58, 11752-11756   |
| PCN-250-Fe2Mn              | 420 < $\lambda$ < 800 | [Ru(bpy)]Cl <sub>2</sub>       | 82.2            | Appl. Catal. B: Environ. 2020, 276, 119173.     |
| 2D-Co <sub>2</sub> TCPE    | $\lambda \geq 420$    | [Ru(bpy)]Cl <sub>2</sub>       | 75.76           | Angew. Chem., Int. Ed., 2020, 59, 23588 – 23592 |
| PCN-250-Fe3                | 420 < $\lambda$ < 800 | [Ru(bpy)]Cl <sub>2</sub>       | 75.5            | Appl. Catal. B: Environ. 2020, 276, 119173.     |
| 2D-Co <sub>2</sub> TCPE-PE | $\lambda \geq 420$    | [Ru(bpy)]Cl <sub>2</sub>       | 74.36           | Angew. Chem., Int. Ed., 2020, 59, 23588 – 23592 |
| Co-ZIF-9                   | $\lambda > 420$       | [Ru(bpy)]Cl <sub>2</sub>       | 58              | Angew. Chem., Int. Ed., 2014, 53, 1034-1038.    |
| MOF-Co                     | $\lambda \geq 420$    | [Ru(bpy)]Cl <sub>2</sub>       | 47.4            | ACS Catal. 2019, 9, 1726-1732.                  |
| ZIF-8                      | $\lambda \geq 420$    | [Ru(bpy)]Cl <sub>2</sub>       | 47.4            | Appl. Catal. B: Environ. 2017, 209, 476-482     |
| Zr-UIO-66-NH <sub>2</sub>  | $\lambda \geq 420$    | [Ru(bpy)]Cl <sub>2</sub>       | 42.8            |                                                 |
